# Supplementary material for: One-step preparation of binder-free WO3 CNFs/GO self-supported electrodes
Source: Royal Society of Chemistry journal article supplement (doi:10.1039/d2nj04523k), 2022-01-01
Supplement: d2nj04523k1.pdf [file d2nj04523k1.pdf]

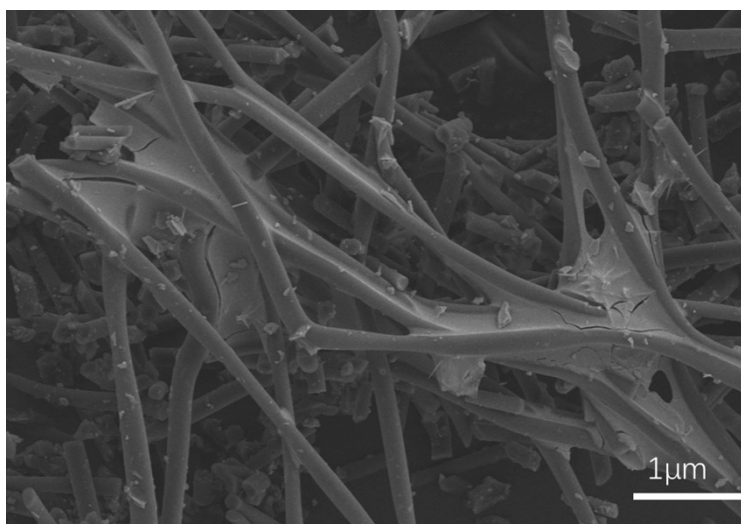

S1. The GO connects the conductive network formed between WCFs.

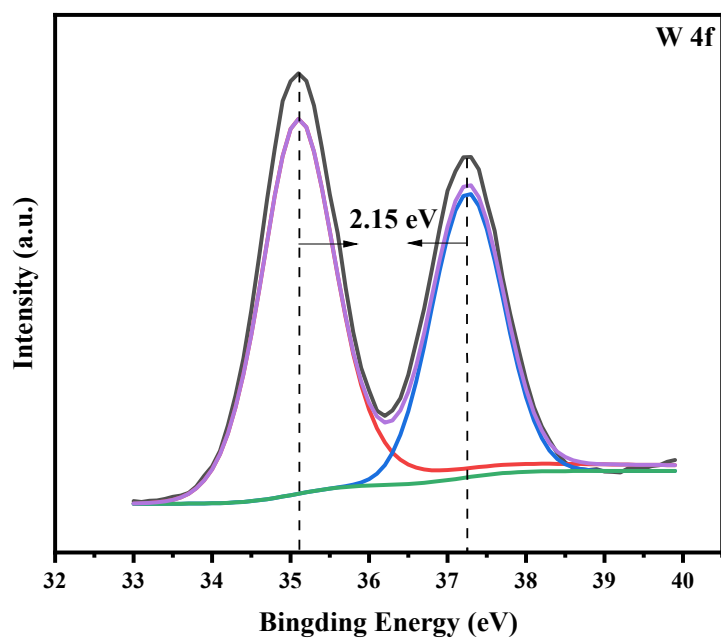

S2. XPS of W in  $\text{WO}_3$  before calcination
